# Supplementary material for: New Kendomycin Derivative Isolated from Streptomyces sp. Cl 58-27
Source: MDPI journal article supplement (doi:10.3390/molecules26226834), 2021-11-12
Supplement: s1 [file s1]

## Supplementary Materials

**Table S1.** NMR spectroscopic data of kendomycin E (1), acquired in CD<sub>3</sub>OD (500 MHz).

| Position | $\delta_C^a$          | $\delta_H^b$      | COSY                | HMBC                                        |
|----------|-----------------------|-------------------|---------------------|---------------------------------------------|
| 1        | 168.5, C              | -                 | -                   | -                                           |
| 2        | 104.7, C              | -                 | -                   | -                                           |
| 3        | 182.6, C              | -                 | -                   | -                                           |
| 4        | 150.1, C              | -                 | -                   | -                                           |
| 4a       | 110.8, C              | -                 | -                   | -                                           |
| 5        | 76.1, CH              | 5.41, d (10.6)    | 2.81-0.94-3.48      | 14.1-38.9-70.9-80.4-110.8-127.2-150.1-182.6 |
| 6        | 39.0, CH              | 2.81, m           | 0.94-3.48-5.41      | 76.1-14.1                                   |
| 7        | 80.4, CH              | 3.48, m           | 2.00-2.81           | 57.9-70.9-76.1-80.4-14.1-38.9               |
| 8        | 37.5, CH <sub>2</sub> | 2.00-1.34, m      | 3.48-3.96           | 39.0-80.4                                   |
| 9        | 70.9, CH              | 3.96, t (10.9)    | 2.00/1.34-1.52/1.41 | 32.6                                        |
| 10       | 32.6, CH <sub>2</sub> | 1.52-1.41, m      | 3.96                | 19.3-29.0-43.1-70.9                         |
| 11       | 33.2, CH <sub>2</sub> | 1.53-1.01, m      | 1.84                | 19.3-29.0                                   |
| 12       | 29.0, CH              | 1.84, m           | 0.89                | -                                           |
| 13       | 43.1, CH <sub>2</sub> | 1.30-1.23, m      | -                   | 19.3-29.0-33.2                              |
| 14       | 46.3, CH              | 2.23, quint (8.1) | 1.35                | 29.0-33.7-42.8-181.5                        |
| 15       | 33.7, CH <sub>2</sub> | 1.35, m           | -                   | 181.5                                       |
| 16       | 42.8, CH              | 2.09, m           | 1.25                | 14.5-33.7-46.3-118.3                        |
| 17       | 118.3, C              | -                 | -                   | -                                           |
| 18       | 157.1, C              | -                 | -                   | -                                           |
| 18a      | 127.2, C              | -                 | -                   | -                                           |
| 19       | 14.5, CH <sub>3</sub> | 0.95, d (6.8)     | 2.81                | 38.9-76.1-80.4                              |
| 20       | 57.8, CH <sub>3</sub> | 3.40, s           | -                   | 80.4                                        |
| 21       | 19.3, CH <sub>3</sub> | 0.89, d (6.4)     | 1.84                | 29.0-33.2-43.1                              |
| 22       | 181.5, C              | -                 | -                   | -                                           |
| 23       | 14.5, CH <sub>3</sub> | 1.25, d (6.7)     | 2.09                | 33.7-42.8-118.3                             |
| 24       | 16.2, CH <sub>3</sub> | 2.78, s           | -                   | 127.2-157.1                                 |
| 25       | 7.9, CH <sub>3</sub>  | 1.88, s           | -                   | 104.7-127.2-168.5-182.6                     |

<sup>a</sup> followed by multiplicity; <sup>b</sup> followed by multiplicity and coupling constant J in Hz.

**Table S2.** Genes in kendomycin biosynthetic gene cluster from *Streptomyces* sp. CL 58-27 and their closest similar proteins.

| Gene # | Function                   | Closest Similar Protein, Identity (%)                                                         |
|--------|----------------------------|-----------------------------------------------------------------------------------------------|
| 1      | methyltransferase          | O-methyltransferase, 45% (migrostatin, <i>Streptomyces platensis</i> subsp. <i>rosaceus</i> ) |
| 2      | unknown                    | -                                                                                             |
| 3      | methyltransferase          | methyltransferase <i>ken9</i> , 54% (kendomycin, <i>Streptomyces violaceoruber</i> )          |
| 4      | unknown                    | -                                                                                             |
| 5      | cytochrome P450            | Cytochrome P450 <i>ncmO</i> , 51% (nocamycin, <i>Saccharothrix syringae</i> )                 |
| 6      | <i>nmrA</i> family protein | Hypothetical protein, 31% (dynemicin A, <i>Micromonospora chersina</i> )                      |

|       |                                                                |                                                                                                  |
|-------|----------------------------------------------------------------|--------------------------------------------------------------------------------------------------|
| 7     | LuxR family transcriptional regulator                          | Regulatory protein, 40% (salinilactam, <i>Salinispora tropica</i> CNB-440)                       |
| 8     | short-chain dehydrogenase/reductase SDR                        | Oxidoreductase, 47% (lugdunomycin, <i>Streptomyces</i> sp. QL37)                                 |
| 9     | transcriptional regulator                                      | Hx1R transcriptional regulator, 51% (microansamycin, <i>Micromonospora</i> sp. HK160111)         |
| 10    | unknown                                                        | -                                                                                                |
| 11    | FAD linked oxidase domain protein                              | Oxidase, 57% (microansamycin, <i>Micromonospora</i> sp. HK160111)                                |
| 12-15 | Binding proteins                                               | -                                                                                                |
| 16    | short-chain dehydrogenase/reductase SDR                        | 2,3-dihydroxybenzoate-2,3-dehydrogenase, 37% (carboxamycin, <i>Streptomyces</i> sp. NTK 937)     |
| 17    | short-chain dehydrogenase/reductase SDR                        | Oxidoreductase, 45% (lugdunomycin, <i>Streptomyces</i> sp. QL37)                                 |
| 18    | unknown                                                        | -                                                                                                |
| 19    | thioesterase                                                   | Thioesterase, 64% (caniferolide A, <i>Streptomyces caniferus</i> )                               |
| 20    | chalcone and stilbene synthase domain protein (T3PKS)          | Type III PKS <i>ken2</i> , 77% (kendomycin, <i>Streptomyces violaceoruber</i> )                  |
| 21    | unknown                                                        | -                                                                                                |
| 22    | enoyl-CoA hydratase                                            | Dioxygenase <i>ken4</i> , 61% (kendomycin, <i>Streptomyces violaceoruber</i> )                   |
| 23    | pyruvate oxidase/decarboxylase                                 | Benzoyl formate decarboxylase <i>ken5</i> , 73% (kendomycin, <i>Streptomyces violaceoruber</i> ) |
| 24    | aldehyde dehydrogenase                                         | Benzaldehyde dehydrogenase <i>ken6</i> , 75% (kendomycin, <i>Streptomyces violaceoruber</i> )    |
| 25    | enoyl-CoA hydratase                                            | enoyl-CoA hydratase <i>ken3/7</i> , 80% (kendomycin, <i>Streptomyces violaceoruber</i> )         |
| 26    | unknown                                                        | -                                                                                                |
| 27    | Beta-ketoacyl synthase                                         | Polyketidesynthase <i>merC</i> , 75% (meridamycin, <i>Streptomyces violaceusniger</i> )          |
| 28    | Short chain dehydrogenase/reductase                            | Polyketidesynthase <i>sceO</i> , 61% (sceliphrolactam, <i>Streptomyces</i> sp. SD85)             |
| 29    | Transcriptional regulator                                      | Transcriptional regulator <i>sceP</i> , 58% (Sceliphrolactam, <i>Streptomyces</i> sp. SD85)      |
| 30    | unknown                                                        | -                                                                                                |
| 31    | $\beta$ ketoacylsynthase (KS-AT-DH-KR/KS-AT-DH-KR/KS-AT-DH-KR) | Polyketidesynthase <i>SceQ</i> , 67% (sceliphrolactam, <i>Streptomyces</i> sp. SD85)             |
| 32    | $\beta$ ketoacylsynthase (KS-AT-KR)                            | Polyketidesynthase <i>sceR</i> , 73% (sceliphrolactam, <i>Streptomyces</i> sp. SD85)             |
| 33    | $\beta$ ketoacylsynthase (KS-AT-DH-KR)                         | Polyketidesynthase <i>sceS</i> , 70% (sceliphrolactam, <i>Streptomyces</i> sp. SD85)             |
| 34    | unknown                                                        | -                                                                                                |
| 35    | unknown                                                        | -                                                                                                |
| 36    | cytochrome P450                                                | cytochrome P450 <i>sceD</i> , 80% (sceliphrolactam, <i>Streptomyces</i> sp. SD85)                |

|    |                                     |                                                                                                        |
|----|-------------------------------------|--------------------------------------------------------------------------------------------------------|
| 37 | cytochrome P450                     | cytochrome P450 <i>sceE</i> , 76% (sceliphrolactam, <i>Streptomyces sp. SD85</i> )                     |
| 38 | dehalogenase                        | Haloalkane dehalogenase <i>sceF</i> , 74% (sceliphrolactam, <i>Streptomyces sp. SD85</i> )             |
| 39 | acyltransferase                     | Transacylase <i>SceG</i> , 70% (sceliphrolactam, <i>Streptomyces sp. SD85</i> )                        |
| 40 | Binding protein                     | Binding protein <i>sceH</i> , 64% (sceliphrolactam, <i>Streptomyces sp. SD85</i> )                     |
| 41 | AMP dependent synthetase and ligase | AMP dependent synthetase and ligase <i>sceI</i> , 73% (sceliphrolactam, <i>Streptomyces sp. SD85</i> ) |
| 42 | AMP dependent synthetase and ligase | AMP dependent synthetase and ligase <i>sceJ</i> , 70% (sceliphrolactam, <i>Streptomyces sp. SD85</i> ) |
| 43 | Diaminopemellate decarboxylase      | Diaminopemellate decarboxylase <i>MacK</i> , 72% (sceliphrolactam, <i>Streptomyces sp. SD85</i> )      |
| 44 | unknown                             | -                                                                                                      |
| 45 | unknown                             | -                                                                                                      |
| 46 | T1PKS (KS-AT-DH-KR, KS-AT-DH-KR)    | Polyketidesynthase <i>sceN</i> , 68% (sceliphrolactam, <i>Streptomyces sp. SD85</i> )                  |
| 47 | T1PKS (KS-AT-DH-KR)                 | Polyketidesynthase <i>sceO</i> , 74% (sceliphrolactam, <i>Streptomyces sp. SD85</i> )                  |
| 48 | thioesterase                        | 53% kendomycin type I PKS (module 7-8)                                                                 |
| 49 | unknown                             | -                                                                                                      |
| 50 | unknown                             | -                                                                                                      |
| 51 | modular PKS                         | 56% mycotrienine                                                                                       |

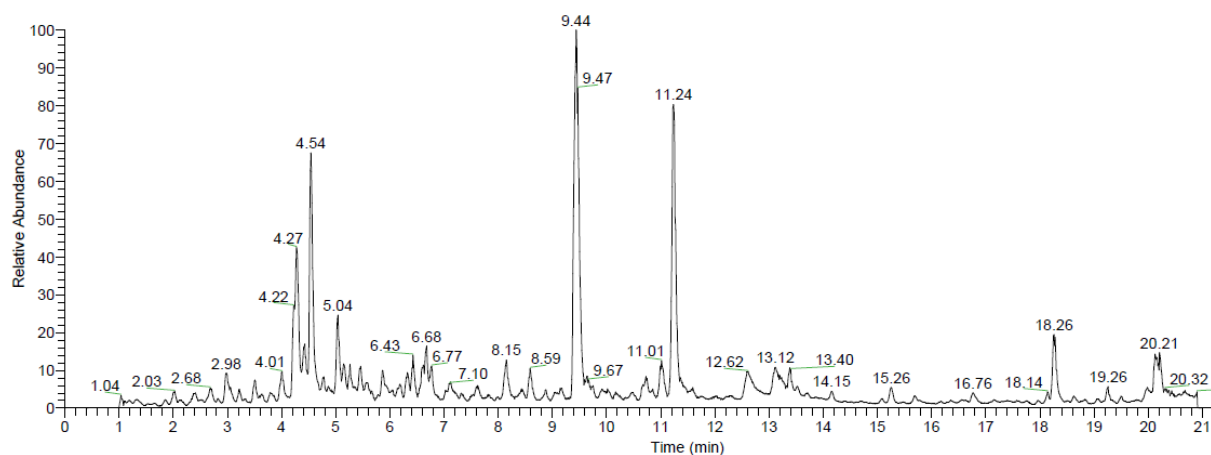

**Figure S1.** LC-HRMS chromatogram of crude extract of CL 58-27. Peak at RT 11.24 min coincides with the targeted compound kendomycin E.

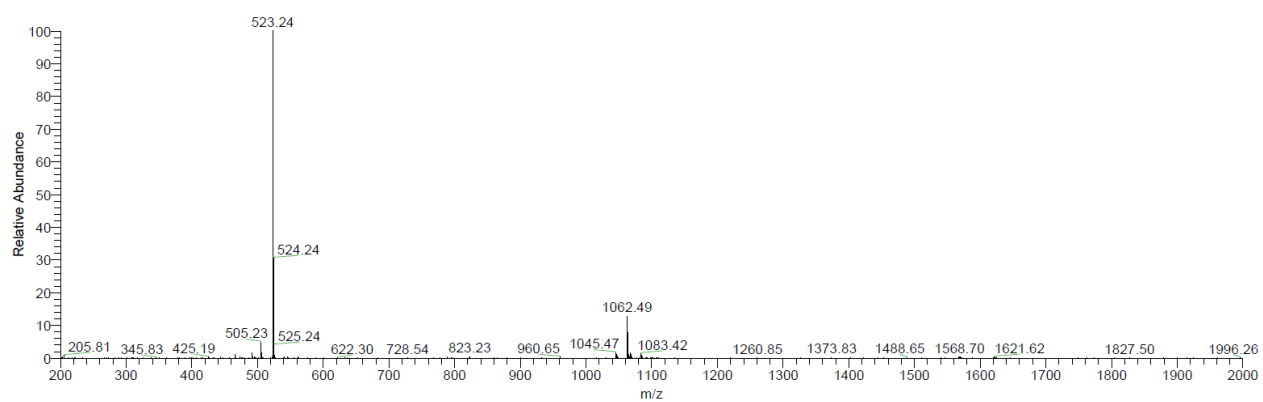

**Figure S2.** Mass chromatogram of kendomycin E showing the  $[M+H]^+$  peak with a mass of 523.24 da.

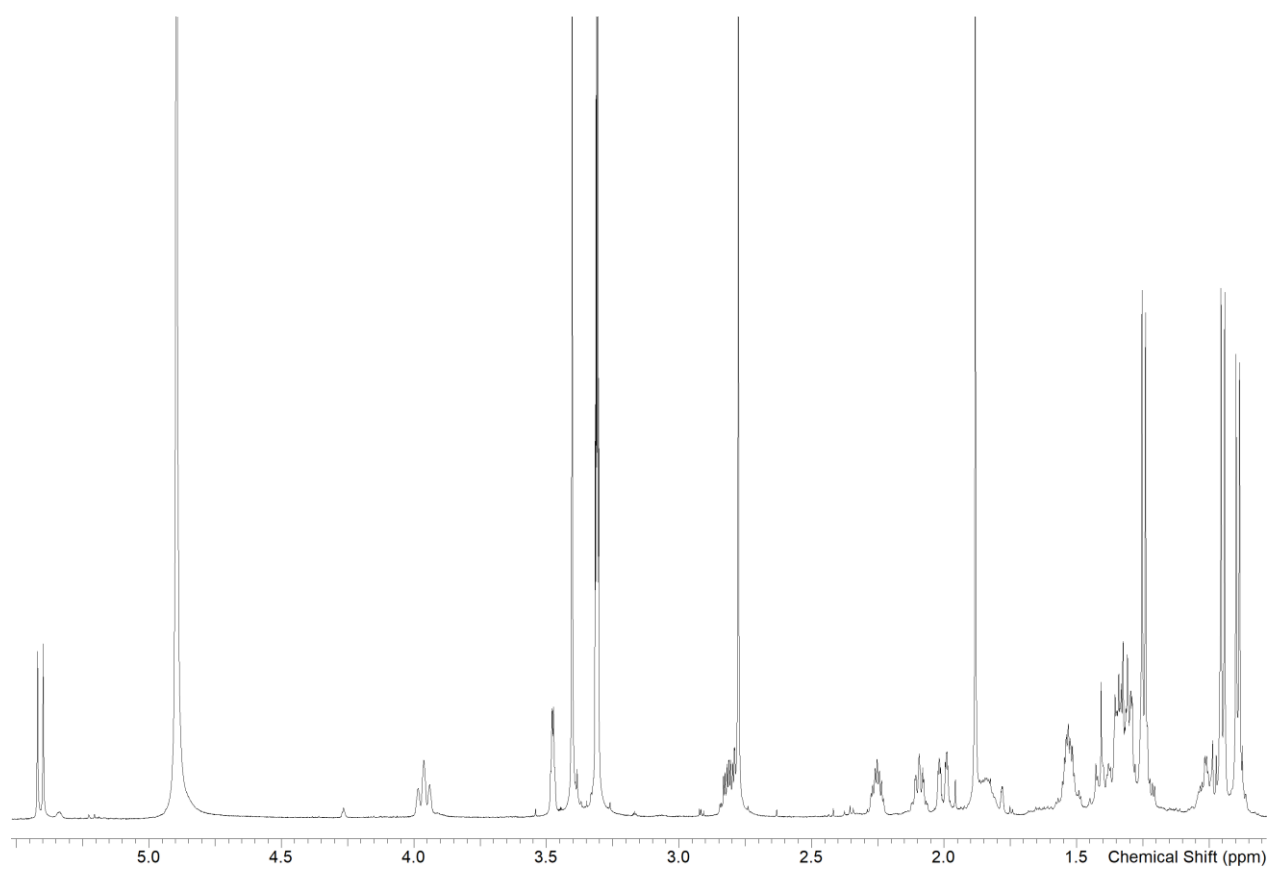

**Figure S3.**  $^1H$  NMR spectrum of kendomycin E measured in  $CD_3OD$  (500 MHz).

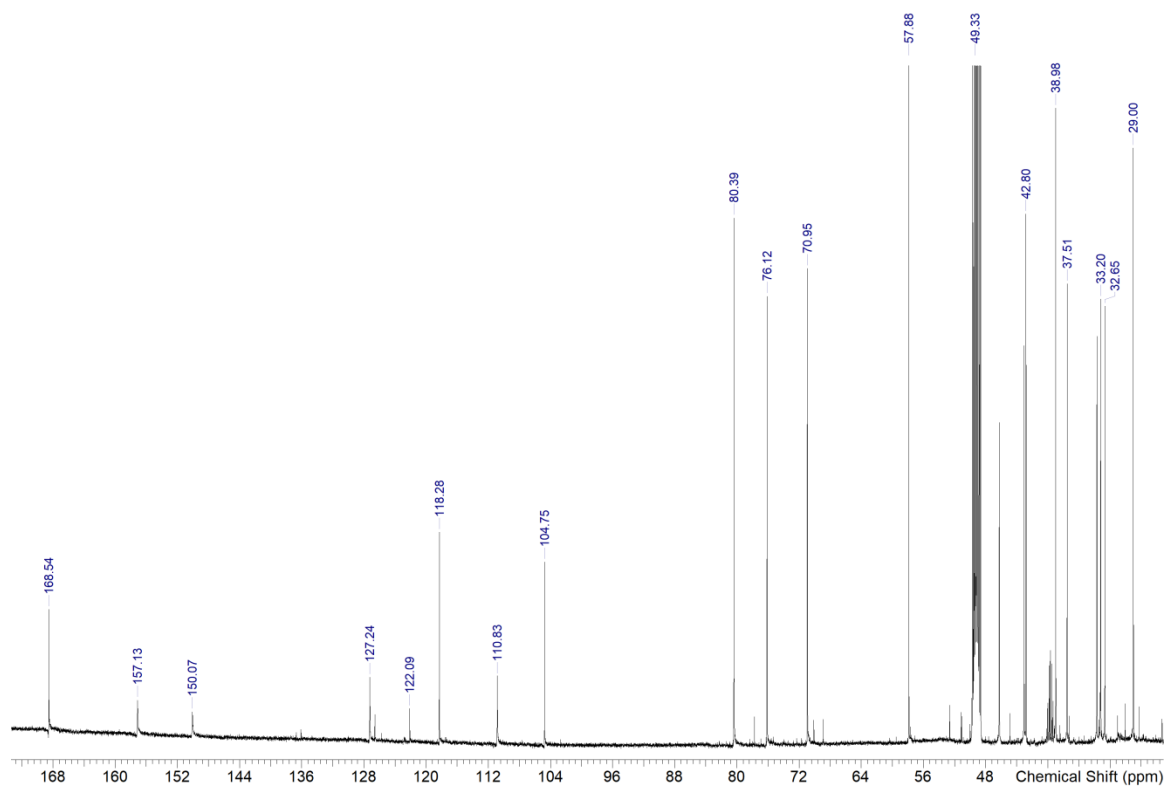

**Figure S4.** <sup>13</sup>C NMR spectrum of kendomycin E measured in CD<sub>3</sub>OD (500 MHz).

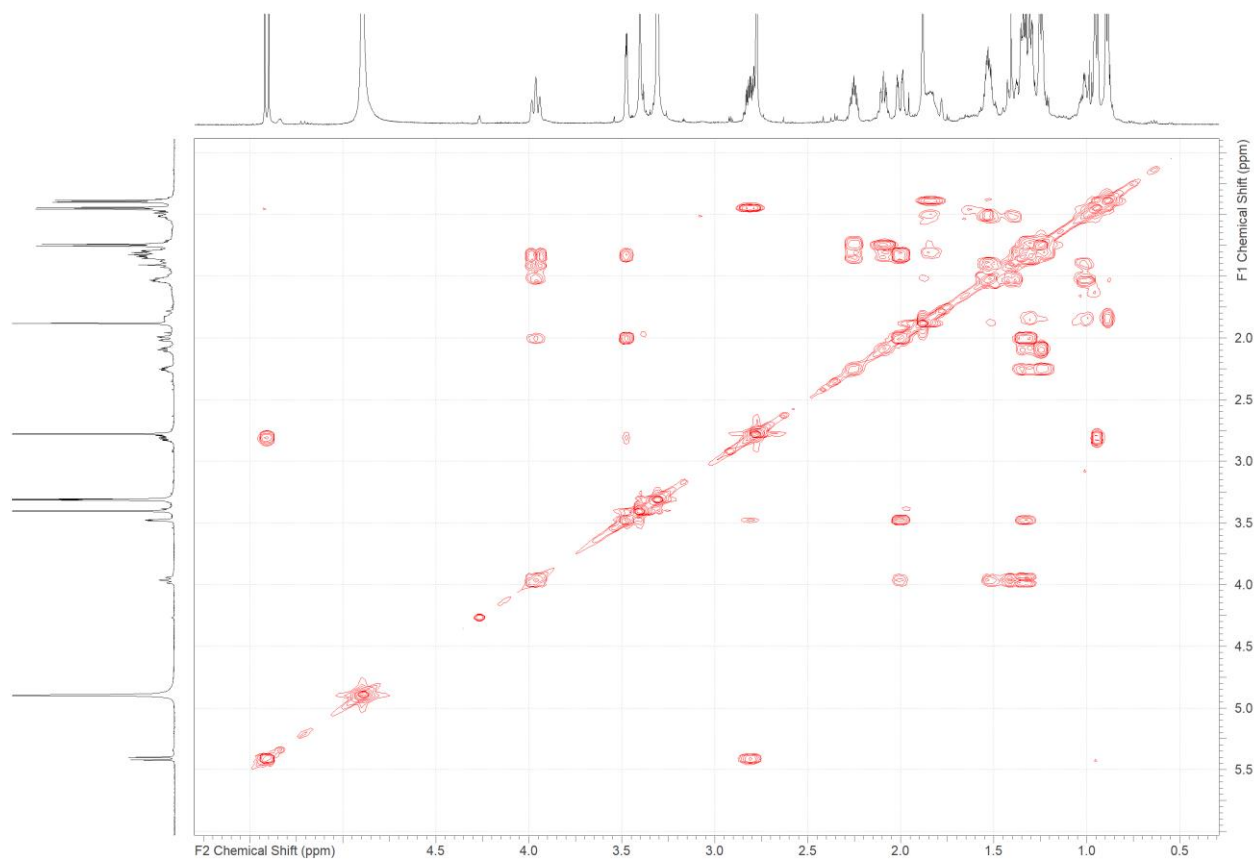

**Figure S5.** <sup>1</sup>H-<sup>1</sup>H COSY NMR spectrum of kendomycin E measured in CD<sub>3</sub>OD (500 MHz).

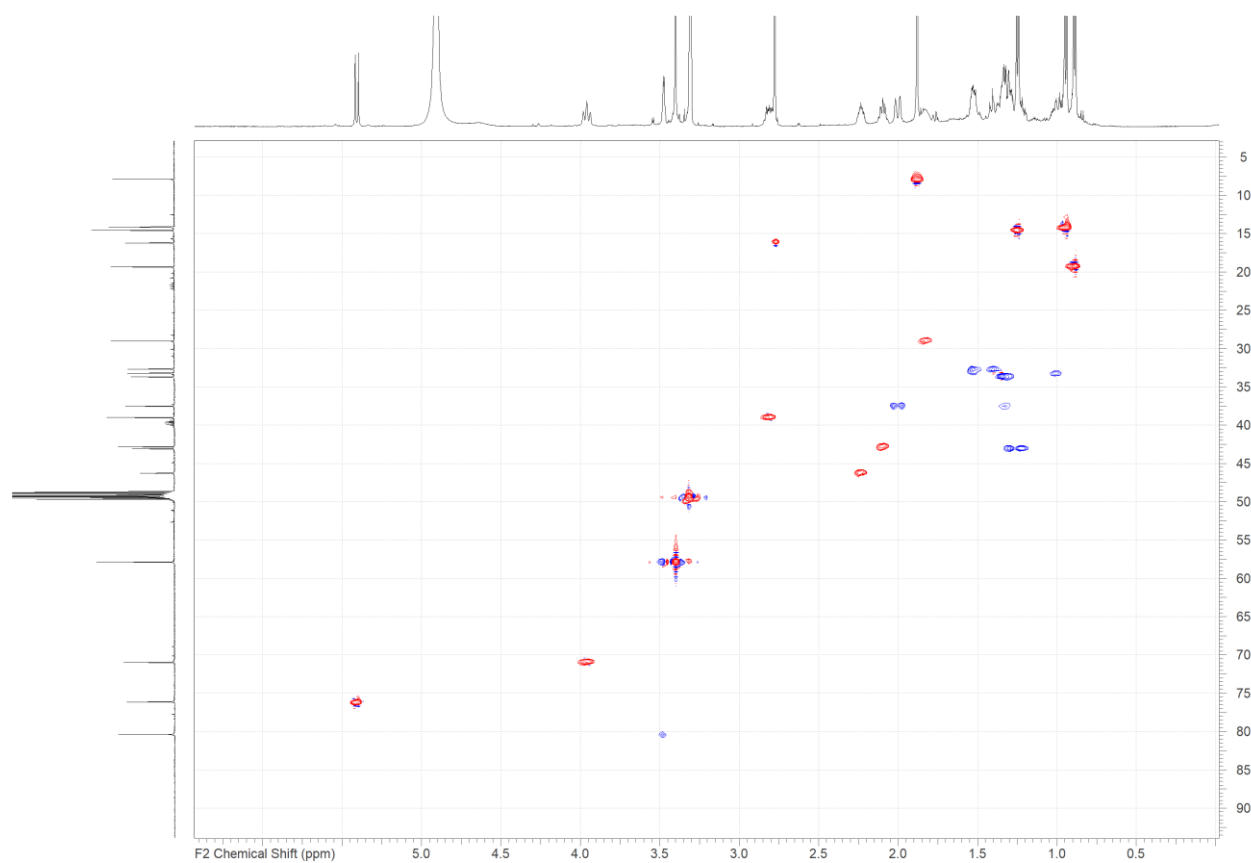

**Figure S6.** HSQC spectrum of kandomycin E measured in  $\text{CD}_3\text{OD}$  (500 MHz).

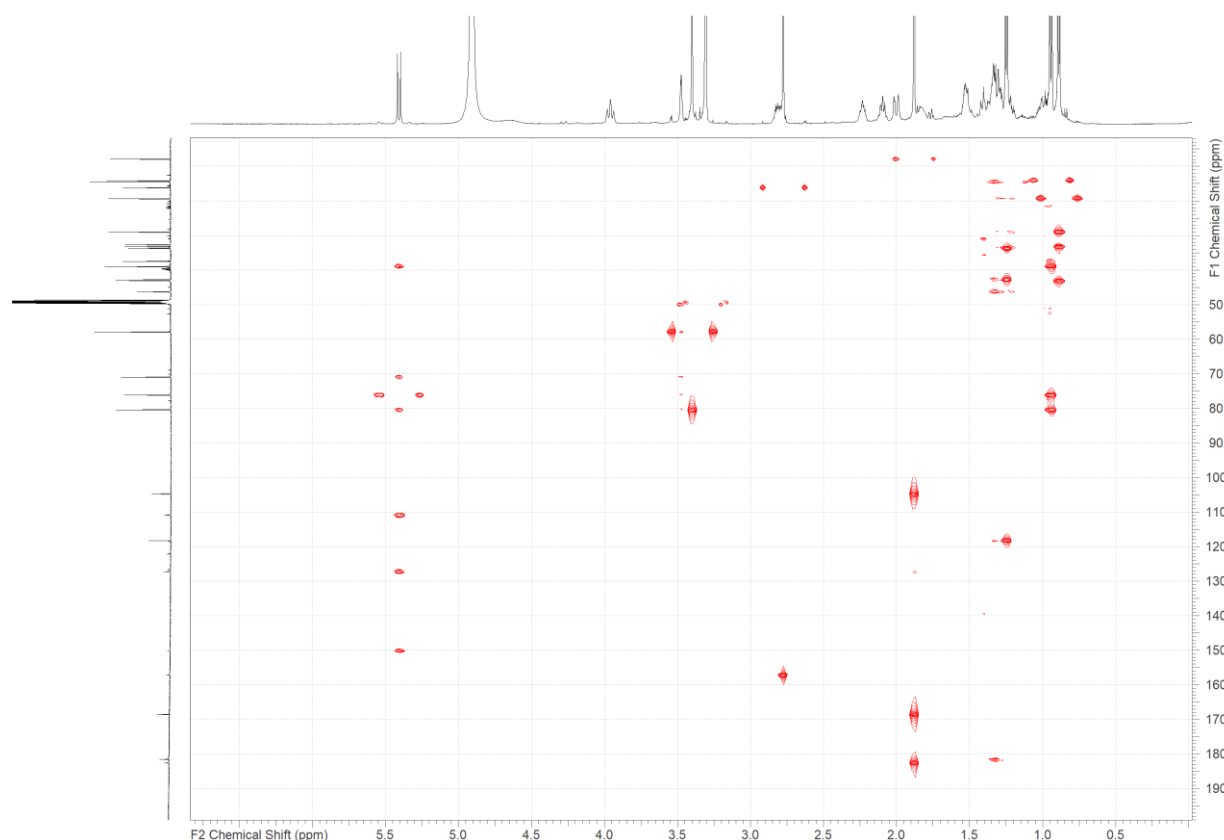

**Figure S7.** HMBC spectrum of kendomycin E measured in CD<sub>3</sub>OD (500 MHz).

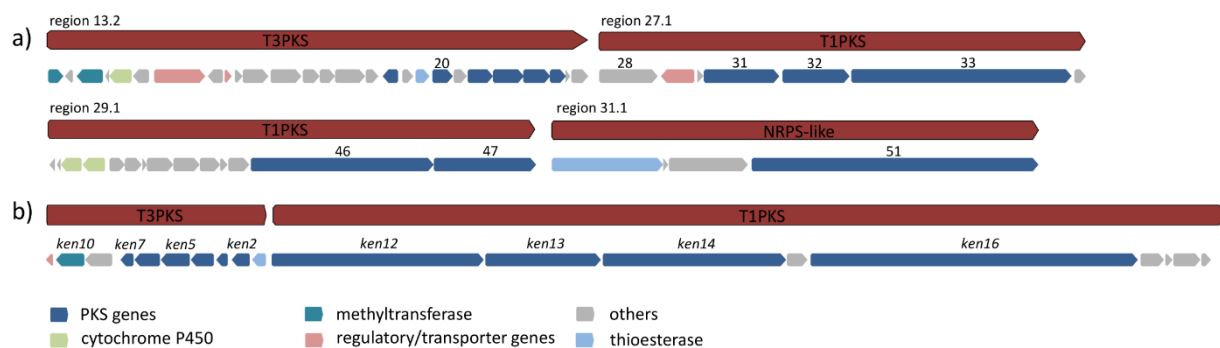

**Figure S8.** (a) Kendomycin gene cluster in *Streptomyces* sp. Cl58-27. (b) Kendomycin gene cluster in *Streptomyces violaceruber* (strain 3844-33C) identified by Wenzel et al. [1].

## References

1. Wenzel, S.C.; Bode, H.B.; Kochems, I.; Müller, R. A type I/type III polyketide synthase hybrid biosynthetic pathway for the structurally unique ansa compound kendomycin. *ChemBiochem* **2008**, *9*, 2711–2721, doi:10.1002/cbic.200800456.
